# Supplementary material for: Origin of the highly enhanced porosity of styryl LDH hybrid-type carbon replicas and study of a subsequent fluorination at low-temperature
Source: Royal Society of Chemistry journal article supplement (doi:10.1039/b610058a), 2006-01-01
Supplement: b610058a.pdf [file b610058a.pdf]

### Supplementary Electronic Information

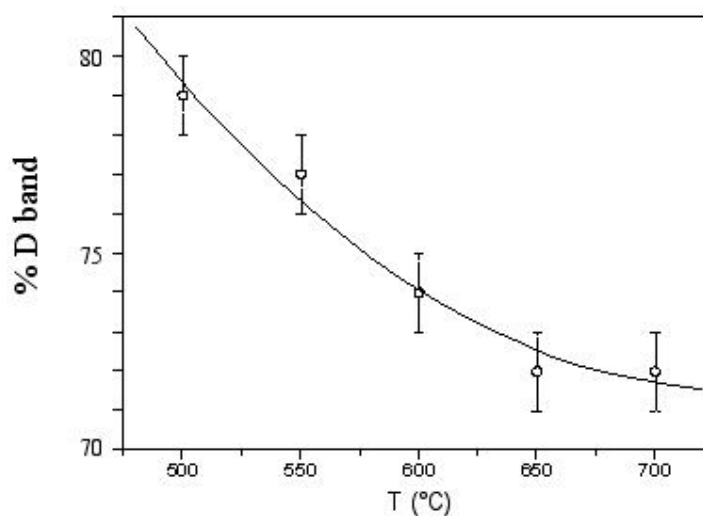

**Fig. 1 SEI**

Evolution of the D and G band as a function of the temperature of carbonisation. Raman spectra were recorded in the back scattering geometry on a Jobin-Yvon T64000 spectrometer equipped with a liquid nitrogen cooled CCD detector. The excitation beam is provided by the 514.5 nm line of an argon ion laser (Spectra physics 2017). All the conditions and data fit were reported in our previous work.<sup>19</sup>

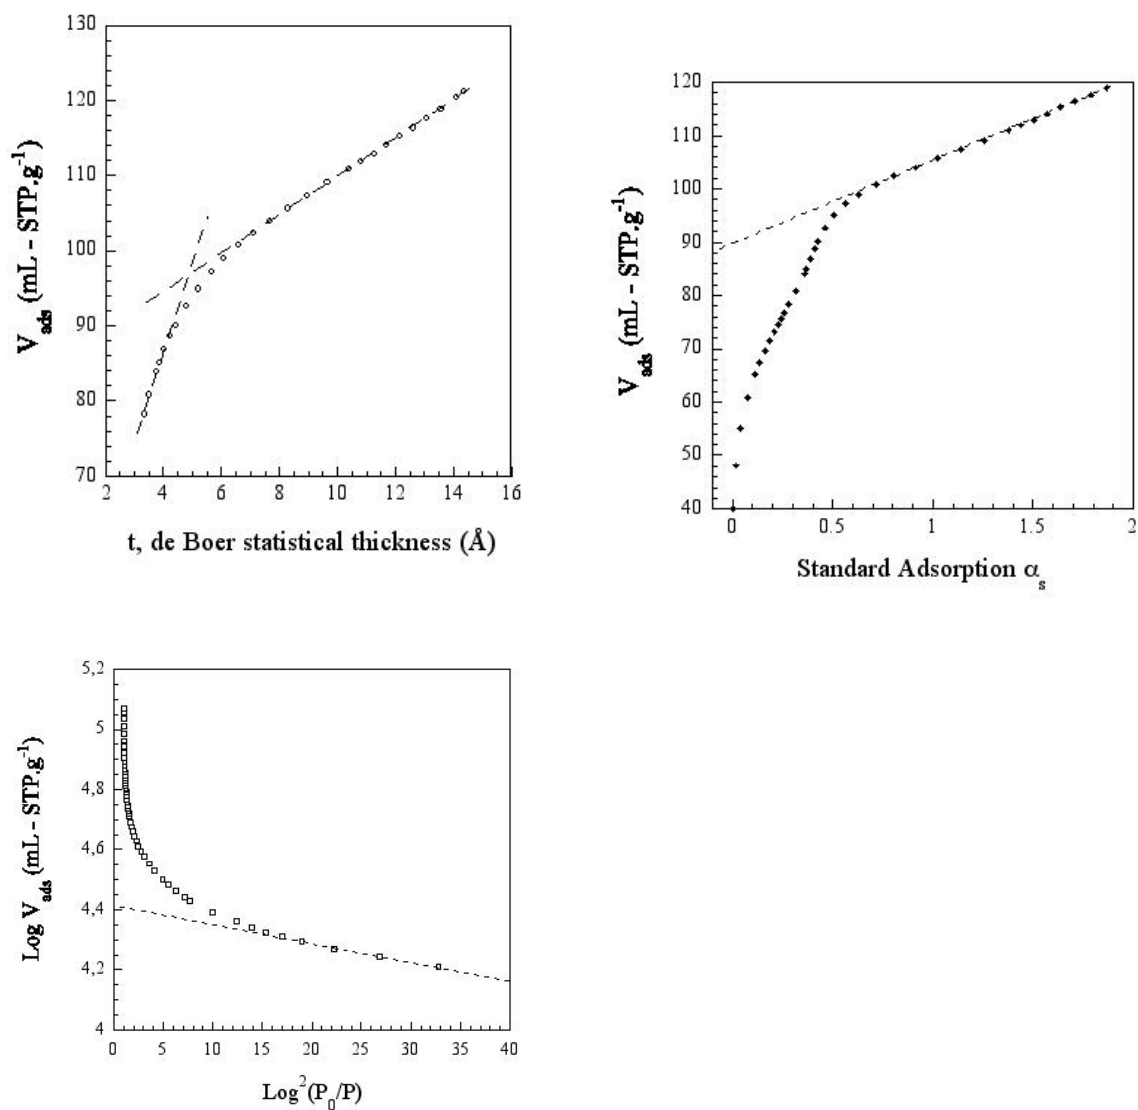

**Fig. 2 SEI**

Analysis of the microporosity of F-100 by a)  $t$ -plot, b)  $\alpha_s$  analysis, and c) Dubinin-Astakhov analysis.

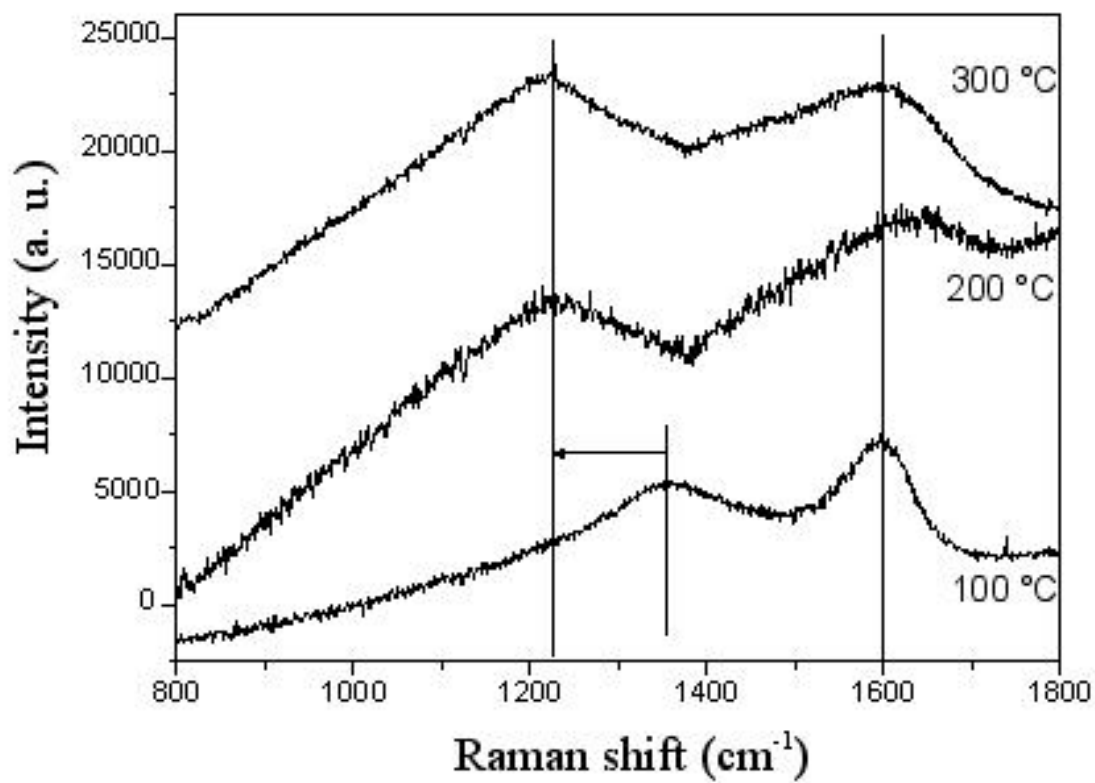

**Fig. 3 SEI**  
Raman spectra of the fluorinated carbon replica.

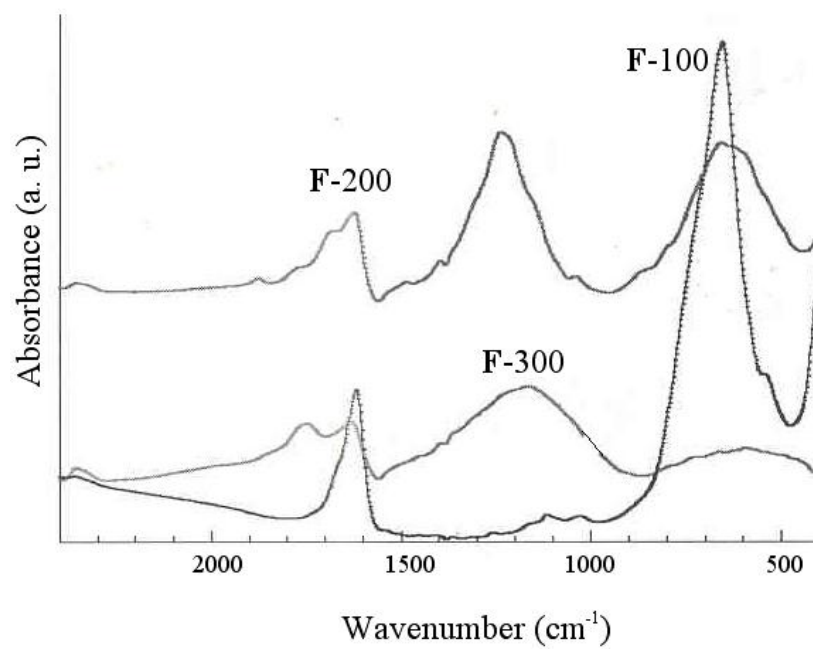

**Fig. 4 SEI**  
IR spectra of the fluorinated carbon replica.
